# Supplementary material
Source: PubMed Central journal article supplement (PMC3993056)
Supplement: Supp_Table1.pdf [file Supp_Table1.pdf]

# Supplementary Data

## SUPPLEMENTARY TABLE S1. SCIENTIFIC

---

### Entomological data

#### Presence of target species (*Aedes aegypti*)

- Is the target species present at selected sites (proposed release and control sites)?
- What data are available on current and historical numbers of the target species at each location (many types of data are relevant and 'ideal' information may not be available)?
- How do those population sizes fluctuate through the different seasons of a year?
- What is the history of the target species and how have populations changed over time (again, many types of data are relevant and 'ideal' information may not be available)?

#### Presence of other mosquito species

- Are other mosquito species present?
- Which species appear and in what estimated or relative numbers in monitoring systems to be used (from any trapping system, but particularly from ovitraps, BG-Sentinels and backpack aspirators).

### Human inhabitants

- What are the approximate numbers and demographics of the human population(s) of proposed release and control sites?

### Presence of disease

- Describe the nature of dengue transmission at the proposed release trial site(s), including possible transmission by species other than *Ae. aegypti*.
- What is the history of dengue at the proposed locations? (Dengue incidence by year, season, location; is there laboratory confirmation of dengue fever and dengue hemorrhagic fever; age-specific incidence; circulating serotypes)
- What is the status of chikungunya and yellow fever viruses in the proposed sites?
- Describe the availability of facilities for monitoring dengue incidence (e.g. medical clinics, clinical research facilities) at the proposed sites, and how these are funded.
- What are the most frequent illnesses and top medical issues for people in the target community? How often are these confused with dengue fever?

### Size(s) of proposed sites

- Describe the scale of site(s) in terms of geographic area (hectares or km<sup>2</sup>). Mosquito and human populations are described in text (Entomological Data and Human inhabitants sections, respectively).

### Duration of trial

- What is the capacity for commitment of the DEC partners to the duration of the trial?

### Isolation

- Are the proposed sites geographically isolated by  $\geq 400$  meters?
- What is the nature of the isolating terrain or other barrier(s) separating the mosquito population at the site from other known or suspected mosquito populations?
- If the sites have  $\leq 400$  meters isolation, what mitigations are available, e.g., barrier treatment in buffer zone?

### Control sites

- Can a control site be identified for each potential trial site?
- To what extent are they similar and different to the proposed release sites in aspects relevant to the trial (or to what extent are there a set of comparable sites to be used either for release or as controls)?

### Protected biotype and other significant resources

- Survey and describe the protected biotypes/ecotypes and other sensitive areas that are within or close to the proposed sites.

### Other vector control activities

- What vector control operations are conducted in the area?
- Who is responsible for these activities?
- How are these activities funded (through which agencies/bodies of government)?
- Who are the contact people for each relevant agency?
- What is known of their program or intentions for treating (or otherwise) the proposed trial sites? Please refer to the questions in the Regulatory section about statutory or compulsory treatment.

### Adverse natural conditions

- Describe the proposed site environment in terms of risk of adverse natural conditions. As appropriate, this should include locations containing laboratory facilities, access routes *etc.*, as well as the proposed release sites themselves.

### Adverse human activities

- What is the distance to roads, railroads, airports and other possible means by which released mosquitoes can be transmitted by humans out of the trial sites?
- Is there a real threat of civil unrest, nationally or in proposed trial area(s)?

### Next steps

- If the planned trial is successful, what are the prospects for moving to a larger scale at the same or nearby site?
-
