# Supplementary material
Source: PubMed Central journal article supplement (PMC3993056)
Supplement: Supp_Table3.pdf [file Supp_Table3.pdf]

## Communication

### Residents

- What are the mechanisms and conditions to facilitate interface with the trial-site residents and basis for ethical, cultural, and social (ESC) collaborations?
  - Describe any previous interactions of the collaborators with the community at the proposed trial site.
  - Is there an ongoing relationship of trust with the public health agencies and institutional scientists?
  - Describe proposed methods for informing and involving the community in preparation for trials. How would community opinions influence planning for the trials?
  - Is there any precedent or other evidence for the likely effectiveness of these methods?
- How is community engagement for vector control normally conducted in the country?
  - What is the level of understanding by communities in the proposed trial sites regarding dengue and the role of mosquitoes in transmitting dengue?
  - What process is used by public health authorities for informing the community about vector control activities? Is a mechanism for community feedback in place?

### Communication Plan

- A Communications Plan will need to be put into place for both proactive and reactive communications.
  - Have stakeholders/influencers in the country and local area been identified?
  - Has a Communications Plan been developed or is one in the process of being developed?
    - At early stages this may be only in draft, outline or partial form.
- What is the local working language?
  - Do the in-country collaborators speak this language or dialect? Visiting scientists?
  - Is translation available as necessary?

## Working environment

### Political environment

- **What is the political system in the country/location? Relevant issues may include:**
  - Levels of government (*e.g.*, federal/state/municipal)
    - Is there conflict between levels of government likely to impose difficulties?
  - Is the political system relatively stable?
    - Are there imminent elections that may disrupt civil service (*e.g.*, collaborators or regulators), or lead to significant shifts in policy (*e.g.*, on GE organisms)?
  - If the country/site has an electoral process, when is the next election that could have a relevant impact on the proposed studies?
  - Who are the relevant authorities in the proposed field site? What are their mandates (may include health/environmental authorities, general government, etc.)?
  - Describe the cultural leadership structure of the community (are there village chiefs, groups of elders, respected religious figures and other nongovernmental figures of respect and authority?).
- Is there a political will to embrace new solutions for dengue control?
  - Evidence?
- What is the political/community history with introductions of GE organisms in the country?
  - What is the level of understanding by communities in the proposed trial-site region regarding genetic engineering?
  - Have there been previous interactions with non-governmental agency or advocacy group?
    - Components may include an overall plan/posture, key messages, frequently asked questions (FAQ) and other question and answer documents, and include local opinion leaders and third-party spokespersons.

### ESC considerations

- If relevant, who has property rights at the proposed field-site location(s)?
    - Is there any risk that the research would displace individuals or communities at the preferred site(s)?
    - Is the proposed site located near to valued community resources or sites where vulnerable populations might be impacted by the trials (*e.g.*, hospitals, recreational areas, schools)?
-
