# Supplementary material
Source: PubMed Central journal article supplement (PMC3993056)
Supplement: Supp_Table4.pdf [file Supp_Table4.pdf]

**People and institutions**

- What are the reasons for interest in an open-release trial?
- What are the expectations of the collaborators?
- Provide the identity and nature of the proposed in-country collaborator and collaborating institution(s)?
  - Institution type (for example, government/university/private sector), size, identity and mission.
  - Previous history of international collaboration? With other project members?
  - Identify key individuals, for example the Principal Investigator, institute director, regulatory officer (if known)
    - Provide the background and relevant experience of key personnel.
    - What are their other duties, and how does this affect the time they have available for project?
  - As applicable, identify skill sets, gaps and training needs
  - Are there any known or foreseeable circumstances under which the institution or individuals might not be able to continue to collaborate for the full duration of project (*e.g.*, short-term contracts, institution reorganizing, unstable mission/activities/funding)

**Financial/employment**

- What policies govern recruitment, hiring, human resources management issues (practices and accountability) in the collaborating institution?
- What are the relative costs of operating in the country/region?
  - Cost-of-living (*e.g.*, relative to the United States or United Kingdom).
  - Indicate typical salaries for different grades (for example, graduate students, technicians, postdoctoral fellows, principle investigator other project personnel).
  - Are travel costs (flight, subsistence) and times unusually high or low?
- Any known additional costs
  - Compulsory benefits, bonuses or insurance, other employment law?
  - Regulatory costs ('user pays') and time?
  - Value Added Taxes (VAT)?

**Logistics**

- How far in distance is it from the collaborator's facility to the proposed field site(s)?
  - Journey time, cost, transport resources
  - Is there safe, reliable access to proposed facilities (*e.g.*, laboratories, field site and travel to/between them)? (see article sections regarding adverse natural and adverse human conditions).

**Collaborator resources**

- What resources does the in-country collaborator propose to provide to the project?
    - Of these, what will be funded by the collaborator, what from third-party sources and what will need to be provided from the project? Project contribution likely will be a mix of in cash and in kind, *e.g.*, provision of personnel, etc.
    - What capacity will be made available to the project to handle regulatory issues (permitting, inspections and compliance); for example, will the collaborating institutions provide people and expertise to oversee applications through the committees?
    - What is the previous experience and evidence of this?
    - What is the capacity to manage epidemiological surveillance and treatment of dengue and dengue hemorrhagic fever?
  - What are the co-sponsorship opportunities?
    - Private foundations
    - Government grants
    - Resource-sharing with current vector control efforts
    - Who is eligible for applying and administering these opportunities?
-
